# Supplementary material
Source: PubMed Central journal article supplement (PMC6613364)
Supplement: NIHMS1032507-supplement-Supplemental.pdf [file NIHMS1032507-supplement-Supplemental.pdf]

Supplementary Material

**A**

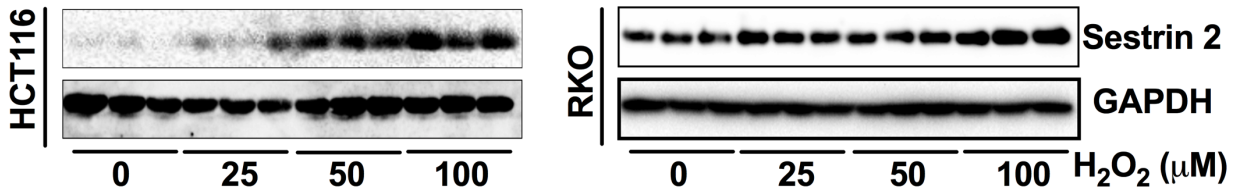

**B**

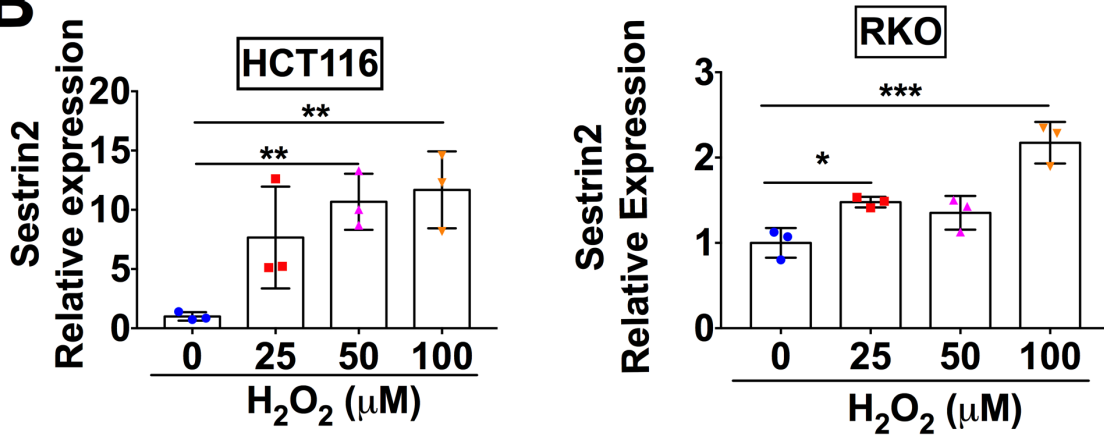

**Figure S1. SESN2 is dose-dependently increased by  $\text{H}_2\text{O}_2$  in CRC cells.**

(A) Western blot analysis and (B) quantification in HCT116 and RKO CRC cells. Cells were treated with different doses of  $\text{H}_2\text{O}_2$  for overnight. \*p<0.05, \*\*p<0.01 and \*\*\*p<0.001.

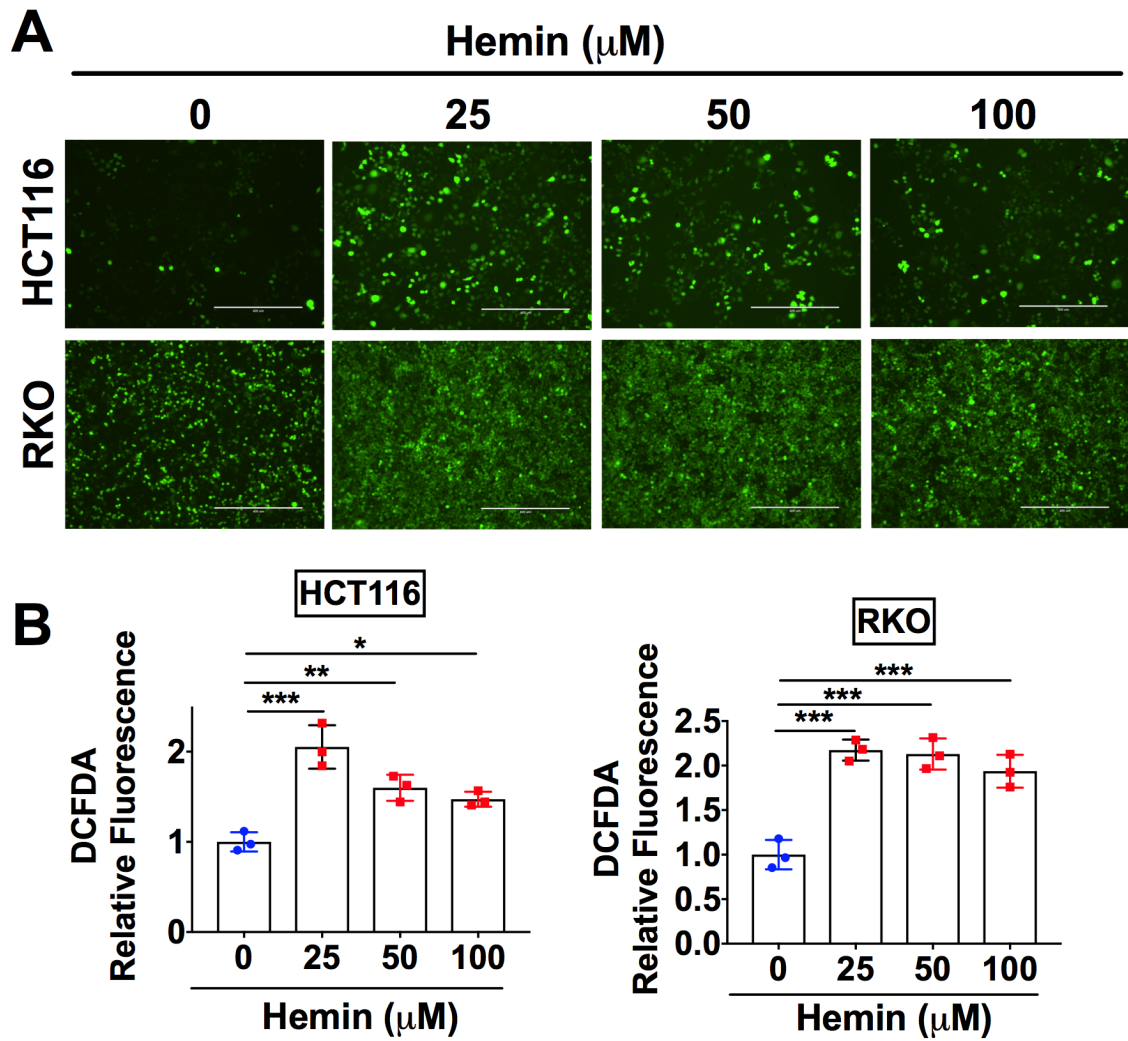

**Figure S2. Hemin dose-dependently increases oxidative stress in CRC cells.**

(A) Representative green fluorescence images and (B) quantification of DCFDA staining in hemin treated cells. HCT116 and RKO CRC cells were treated with different doses of hemin for overnight and then DCFDA staining was performed. \* $p < 0.05$ , \*\* $p < 0.01$  and \*\*\* $p < 0.001$ .

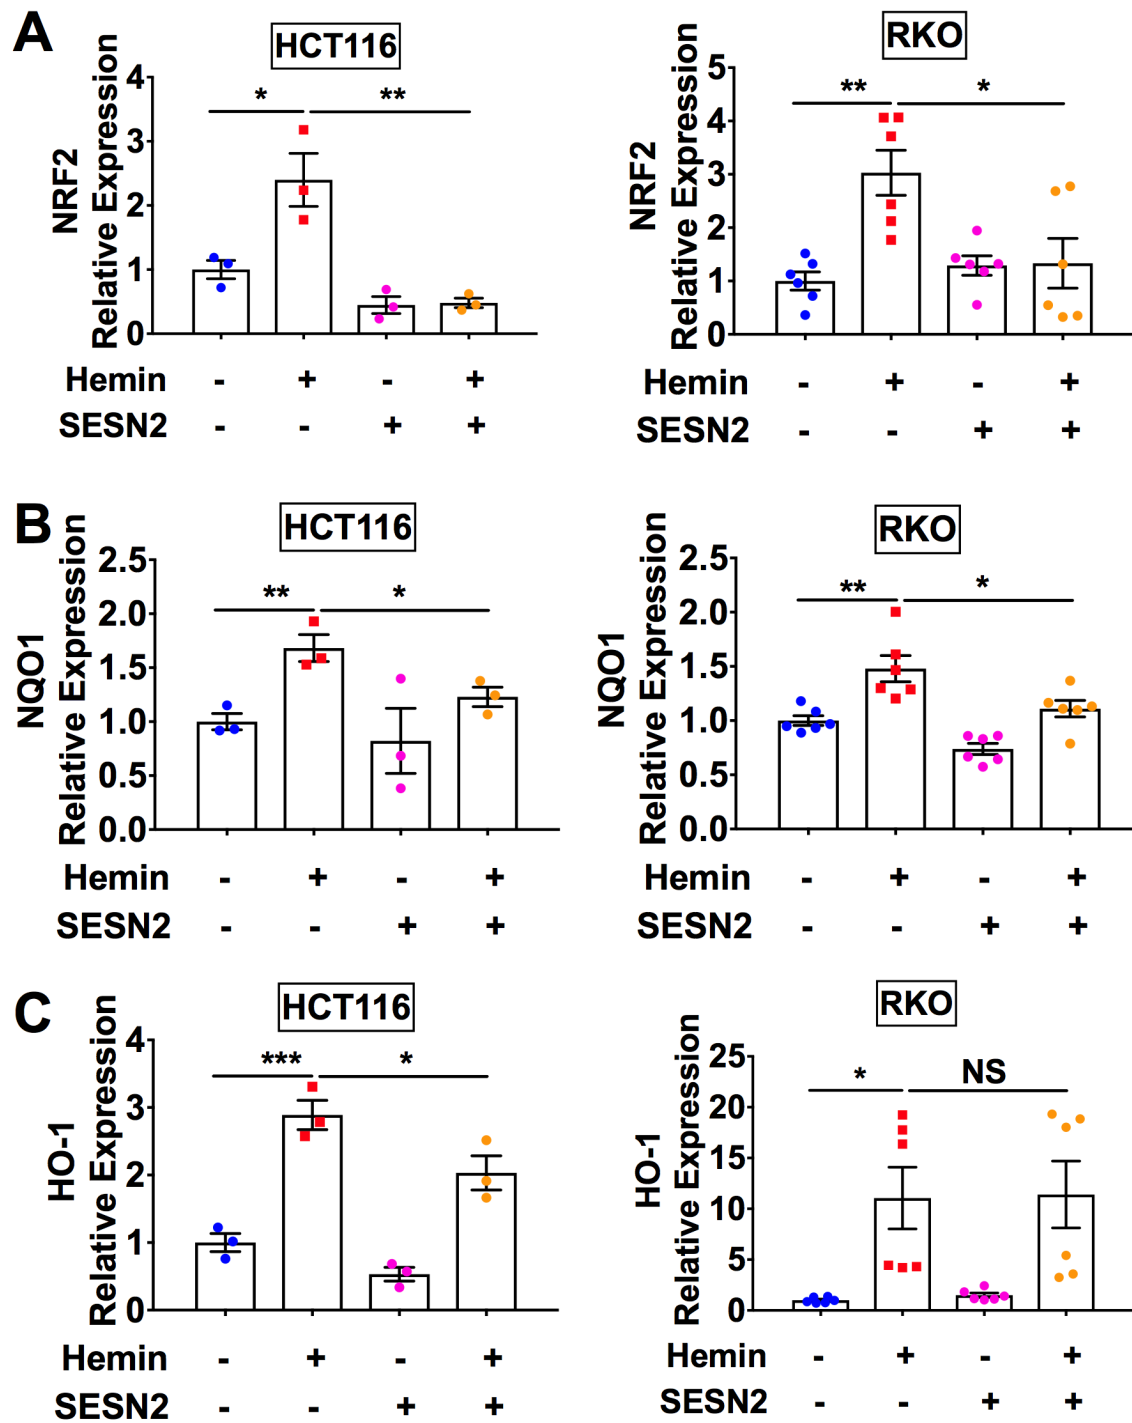

**Figure S3. SESN2 overexpression reduces the expression of hemin-enhanced oxidative stress responsive proteins in CRC cells.**

(A) Quantification of the expression of NRF2, (B) NQO1 and (C) HO-1 in HCT116 and RKO CRC from Figure 4C. \* $p < 0.05$ , \*\* $p < 0.01$  and \*\*\* $p < 0.001$ . NS, Not significant.
